# Supplementary material
Source: PubMed Central journal article supplement (PMC5788449)
Supplement: NIHMS907160-supplement-3.pdf [file NIHMS907160-supplement-3.pdf]

## Supporting Information

for

### Evaluation of intensity drift correction strategies using MetaboDrift, a normalization tool for multi-batch metabolomics data

Chanisa Thonusin<sup>1,2,3</sup>, Heidi B. IglayReger<sup>1</sup>, Tanu Soni<sup>1</sup>, Amy E. Rothberg<sup>1</sup>, Charles F. Burant<sup>1,2</sup> and Charles R. Evans<sup>1\*</sup>

<sup>1</sup>Department of Internal Medicine, <sup>2</sup>Department of Molecular and Integrative Physiology, 6300 Brehm Tower, University of Michigan, Ann Arbor, MI 48109. <sup>3</sup>Faculty of Medicine, Chiang Mai University, Chiang Mai, Thailand.

\*to whom correspondence should be addressed  
email: [chevans@umich.edu](mailto:chevans@umich.edu)

#### Table of Contents

| Page | Content                                                                                                                                                                                                                                          |
|------|--------------------------------------------------------------------------------------------------------------------------------------------------------------------------------------------------------------------------------------------------|
| 2    | <b>Table S1.</b> List of all 122 metabolites quantitated in MMTT study, along with adjusted p-values and designation of metabolites significantly different in non-obese subjects (n=16) between t=0 and t=60 min following consumption of MMTT. |
| 3    | <b>Table S2:</b> Internal standard compounds and concentrations used in metabolite extraction solvent                                                                                                                                            |
| 4    | <b>Table S3.</b> A) Pearsons correlation coefficients of 27 metabolites for five different normalization strategies compared to internal standard normalization B) % RSD of stable-isotope labeled IS compounds in non-QC samples from MMTT data |
| 5    | <b>Figure S1.</b> Effect of QC drift correction on metabolites from MMTT dataset. QC-sample peak areas for select metabolites before (a,c,e) and after (b,d,f) quadratic (QUAD) drift correction, performed as described in section 2.4.         |
| 6    | <b>Figure S2.</b> Flowchart to aid in selection of normalization or drift-correction strategy for metabolomics data.                                                                                                                             |

**Table S1.** List of all 122 metabolites measured in the MMTT study; also includes adjusted p-values and designation of metabolites significantly different in non-obese subjects (n=16) between t=0 and t=60 min following consumption of MMTT. p-values were adjusted for multiple comparisons using Benjamini-Hochberg correction with FDR of 0.05. A= significantly different using QUAD-drift corrected data (p<0.05); B= significantly different using RAW data (p<0.05)

| Metabolite                 | Benj Hoch adj. p-value (QUAD drift corrected) | Benj Hoch adj. p-value (RAW data) | Sig? | Metabolite            | Benj Hoch adj. p-value (QUAD drift corrected) | Benj Hoch adj. p-value (RAW data) | Sig? |
|----------------------------|-----------------------------------------------|-----------------------------------|------|-----------------------|-----------------------------------------------|-----------------------------------|------|
| Palmitic acid              | 3.6553E-07                                    | 6.10741E-06                       | A,B  | Acetoacetate          | 0.137401224                                   | 0.904483751                       |      |
| Linoleic acid              | 4.67745E-07                                   | 6.10741E-06                       | A,B  | Carnitine-L           | 0.150977561                                   | 0.231747482                       |      |
| Oleic acid                 | 5.54432E-07                                   | 6.10741E-06                       | A,B  | Succinate             | 0.152619931                                   | 0.087794242                       |      |
| Stearic acid               | 1.28802E-06                                   | 6.10741E-06                       | A,B  | Ornithine             | 0.169659816                                   | 0.843596605                       |      |
| Myristic acid              | 1.51476E-06                                   | 6.10741E-06                       | A,B  | TG(54:1)              | 0.169659816                                   | 0.821761824                       |      |
| Proline                    | 1.51476E-06                                   | 0.000161712                       | A,B  | Citrulline            | 0.179710914                                   | 0.881977334                       |      |
| Alanine                    | 3.76227E-05                                   | 0.000529608                       | A,B  | DAG(36:1)             | 0.180360221                                   | 0.881977334                       |      |
| Palmitoleic acid           | 3.76227E-05                                   | 0.000189576                       | A,B  | PE(38:4)              | 0.181293783                                   | 0.74358905                        |      |
| Tyrosine                   | 3.76227E-05                                   | 0.003081065                       | A,B  | LysoPC(18:0)          | 0.182664884                                   | 0.786713883                       |      |
| Lysine                     | 3.91925E-05                                   | 0.009581752                       | A,B  | TG(52:4)              | 0.190455454                                   | 0.581298183                       |      |
| (Iso)leucine               | 7.06099E-05                                   | 0.001584709                       | A,B  | DAG(36:2)             | 0.200798824                                   | 0.762417211                       |      |
| Methionine                 | 0.000137403                                   | 0.004873003                       | A,B  | PA(36:1)              | 0.201138951                                   | 0.562948726                       |      |
| Valine                     | 0.000137403                                   | 0.07838589                        | A    | Carnitine-C18         | 0.218159831                                   | 0.762417211                       |      |
| Phenylalanine              | 0.000153922                                   | 0.033869865                       | A,B  | PE(38:6)              | 0.218159831                                   | 0.769716631                       |      |
| Chenodeoxyglycocholic acid | 0.000283313                                   | 0.004992161                       | A,B  | PI(36:1)              | 0.218159831                                   | 0.897969275                       |      |
| LysoPG(18:1)               | 0.000529572                                   | 0.009655643                       | A,B  | TG(52:2)              | 0.218159831                                   | 0.645457836                       |      |
| Histidine                  | 0.000569032                                   | 0.01919214                        | A,B  | LysoPE(16:0)          | 0.240725308                                   | 0.786713883                       |      |
| Arachidic acid             | 0.000618785                                   | 0.000196553                       | A,B  | Carnitine-C8:1        | 0.250910604                                   | 0.288796917                       |      |
| Tryptophan                 | 0.000678228                                   | 0.233085688                       | A    | PE(34:1)              | 0.256264987                                   | 0.655581338                       |      |
| Carnitine-C14:1            | 0.00128093                                    | 0.00824919                        | A,B  | N-Acetylmethionine    | 0.260424703                                   | 0.60422045                        |      |
| Threonine                  | 0.0013842                                     | 0.01325256                        | A,B  | LysoPS(18:0)          | 0.261528057                                   | 0.390490028                       |      |
| Arginine                   | 0.001455225                                   | 0.011895367                       | A,B  | TG(52:3)              | 0.261528057                                   | 0.538125356                       |      |
| Serine                     | 0.001455225                                   | 0.04254198                        | A,B  | p-Aminobenzoate       | 0.34453598                                    | 0.74358905                        |      |
| Carnitine-C12              | 0.002250728                                   | 0.008547364                       | A,B  | DAG(34:1)             | 0.349618988                                   | 0.843596605                       |      |
| Carnitine-C12:1            | 0.002250728                                   | 0.004992161                       | A,B  | PC(34:1)              | 0.357378527                                   | 0.897969275                       |      |
| Asparagine                 | 0.003248218                                   | 0.059726535                       | A    | TG(50:2)              | 0.359448083                                   | 0.74358905                        |      |
| Cytosine                   | 0.003830723                                   | 0.77191989                        | A    | Homocysteic acid      | 0.364937368                                   | 0.762417211                       |      |
| Carnitine-C14:2            | 0.003949826                                   | 0.007902628                       | A,B  | PG(36:2)              | 0.395035948                                   | 0.900351008                       |      |
| Citrate                    | 0.004817971                                   | 0.589895492                       | A    | PC(36:1)              | 0.406013872                                   | 0.904483751                       |      |
| Malate                     | 0.00615898                                    | 0.009581752                       | A,B  | Creatinine            | 0.425922974                                   | 0.264731949                       |      |
| Glycine                    | 0.007518042                                   | 0.024767514                       | A,B  | Glutamate             | 0.425922974                                   | 0.645457836                       |      |
| LysoPC(18:1)               | 0.007706794                                   | 0.60477849                        | A    | TG(50:1)              | 0.457026021                                   | 0.97653221                        |      |
| Lactate                    | 0.009091327                                   | 0.00741099                        | A,B  | TG(54:8)              | 0.480416858                                   | 0.317487839                       |      |
| Carnitine-C16:1            | 0.009298869                                   | 0.007843882                       | A,B  | PC(34:2)              | 0.495318091                                   | 0.904483751                       |      |
| Uridine                    | 0.009775654                                   | 0.021572963                       | A,B  | 2,3-Dihydroxybenzoate | 0.51311999                                    | 0.978033853                       |      |
| Carnitine-C10              | 0.010078168                                   | 0.005851187                       | A,B  | PG(34:1)              | 0.524830588                                   | 0.897969275                       |      |
| Glutamine                  | 0.010481249                                   | 0.113281265                       | A    | PG(38:1)              | 0.524830588                                   | 0.786713883                       |      |
| PE(36:2)                   | 0.017685369                                   | 0.74358905                        | A    | Docosanoic acid       | 0.549131881                                   | 0.74358905                        |      |
| Acetyl-CoA                 | 0.018543809                                   | 0.74358905                        | A    | LysoPC(16:0)          | 0.553015109                                   | 0.897969275                       |      |
| CoA                        | 0.018567595                                   | 0.74358905                        | A    | FAD                   | 0.57283394                                    | 0.571441637                       |      |
| Carnitine-C2               | 0.019608735                                   | 0.000161712                       | A,B  | LysoPI(18:0)          | 0.57283394                                    | 0.843596605                       |      |
| Carnitine-C5               | 0.01998981                                    | 0.904483751                       | A    | TG(52:1)              | 0.57283394                                    | 0.544654114                       |      |
| AKG                        | 0.023597776                                   | 0.244809498                       | A    | PG(36:1)              | 0.590676812                                   | 0.897969275                       |      |
| Carnitine-C3               | 0.027289359                                   | 0.897969275                       | A    | Carnitine-C4          | 0.600683526                                   | 0.03501179                        | B    |
| LysoPE(18:1)               | 0.034042066                                   | 0.544654114                       | A    | PA(34:1)              | 0.600683526                                   | 0.897969275                       |      |
| Hypoxanthine               | 0.034646622                                   | 0.022551906                       | A,B  | PS(40:6)              | 0.600683526                                   | 0.843596605                       |      |
| Ketoleucine+leucine        | 0.043991338                                   | 0.632765275                       | A    | PE(36:1)              | 0.618117012                                   | 0.778649036                       |      |
| Allochenodeoxycholic acid* | 0.04643009                                    | 0.091211922                       | A    | TG(48:0)              | 0.618996535                                   | 0.904483751                       |      |
| Carnitine-C10:1            | 0.046438313                                   | 0.00382414                        | A,B  | PC(36:4)              | 0.62820389                                    | 0.904483751                       |      |
| Carnitine-C8               | 0.048629561                                   | 0.00382414                        | A,B  | PI(36:2)              | 0.63591752                                    | 0.897969275                       |      |
| Carnitine-C14              | 0.064221902                                   | 0.008547364                       | B    | PA(36:2)              | 0.67135358                                    | 0.904483751                       |      |
| Carnitine-C18:1            | 0.068589324                                   | 0.008066292                       | B    | Geranyl-PP            | 0.689182506                                   | 0.467341939                       |      |
| TG(54:2)                   | 0.072109001                                   | 0.904483751                       |      | PE(38:2)              | 0.772377421                                   | 0.652724906                       |      |
| Hexose                     | 0.074797639                                   | 0.598974795                       |      | LysoPE(20:2)          | 0.772841151                                   | 0.674249624                       |      |
| LysoPE(20:0)               | 0.083824951                                   | 0.269954168                       |      | Aspartate             | 0.842411763                                   | 0.904483751                       |      |
| MAG(18:0)                  | 0.083824951                                   | 0.021572963                       | B    | PS(38:4)              | 0.842411763                                   | 0.762417211                       |      |
| PC(38:6)                   | 0.113570262                                   | 0.897969275                       |      | Carnitine-C16         | 0.862243737                                   | 0.047838936                       | B    |
| Carnitine-C18:2            | 0.121097528                                   | 0.011895367                       | B    | Taurine               | 0.862243737                                   | 0.803215287                       |      |
| LysoPE(18:0)               | 0.121097528                                   | 0.75495083                        |      | NAD+                  | 0.891095732                                   | 0.904483751                       |      |
| PS(36:2)                   | 0.121097528                                   | 0.544654114                       |      | PI(34:1)              | 0.892810764                                   | 0.99054495                        |      |
| PC(36:2)                   | 0.124905112                                   | 0.762417211                       |      | PI(38:4)              | 0.922617571                                   | 0.904483751                       |      |

**Table S2.** Internal standards used for quantitation of targeted metabolites. NSK-B internal standard mix was purchased from Cambridge Isotope (Andover, MA). All other carbon-13 stable isotope internal standards were purchased from Sigma-Aldrich (St. Louis, MO).

| Internal Standards                                       | Internal standard concentration in extraction solvent |
|----------------------------------------------------------|-------------------------------------------------------|
| Algal amino acid mixture_ $^{13}\text{C}$ (Sigma 426199) | 20 $\mu\text{g/mL}$                                   |
| Alpha-ketoglutarate_ $^{13}\text{C}_4$                   | 4 $\mu\text{M}$                                       |
| Citrate_ $^{13}\text{C}_6$                               | 20 $\mu\text{M}$                                      |
| Lactate_ $^{13}\text{C}_3$                               | 400 $\mu\text{M}$                                     |
| Malate_ $^{13}\text{C}_4$                                | 8 $\mu\text{M}$                                       |
| NSK-B acylcarnitine internal standard mix                |                                                       |
| $^2\text{H}_9$ -Carnitine (L-carnitine)                  | 510.33 nM                                             |
| $^2\text{H}_3$ -Acetylcarnitine (C2)                     | 128.33 nM                                             |
| $^2\text{H}_3$ -Propionylcarnitine (C3)                  | 25.33 nM                                              |
| $^2\text{H}_3$ -Butyrylcarnitine (C4)                    | 25.33 nM                                              |
| $^2\text{H}_9$ -Isovalerylcarnitine (C5)                 | 25.33 nM                                              |
| $^2\text{H}_3$ -Octanoylcarnitine (C8)                   | 25.33 nM                                              |
| $^2\text{H}_9$ -Myristoylcarnitine (C14)                 | 25.33 nM                                              |
| $^2\text{H}_3$ -Palmitoylcarnitine (C16)                 | 50.67 nM                                              |
| Oleic acid_ $^{13}\text{C}_{18}$                         | 5 $\mu\text{M}$                                       |
| Palmitic acid_ $^{13}\text{C}_{16}$                      | 5 $\mu\text{M}$                                       |
| Succinate_ $^{13}\text{C}_4$                             | 40 $\mu\text{M}$                                      |

**Table S3.** A) Pearsons correlation coefficients of 27 metabolites for five different normalization strategies compared to internal standard normalization B) % RSD of stable-isotope labeled IS compounds in non-QC samples from MMTT data

|                     | A) Pearsons correlation coefficient for normalization methods vs. internal standard normalization |              |              |              |              |              | B) % RSD for IS compounds in non-QC samples |              |              |              |              |              |
|---------------------|---------------------------------------------------------------------------------------------------|--------------|--------------|--------------|--------------|--------------|---------------------------------------------|--------------|--------------|--------------|--------------|--------------|
|                     | Raw                                                                                               | Quad         | CUB-SPL      | LOE-SS       | Total Signal | Med. Signal  | Raw                                         | Quad         | CUB-SPL      | LOE-SS       | Total Signal | Med. Signal  |
| Alanine             | 0.455                                                                                             | 0.797        | 0.807        | 0.798        | 0.565        | 0.561        | 42.9%                                       | 15.4%        | 15.3%        | 15.1%        | 41.0%        | 38.8%        |
| Alpha-ketoglutarate | 0.591                                                                                             | 0.811        | 0.809        | 0.802        | 0.673        | 0.780        | 41.2%                                       | 12.6%        | 12.7%        | 12.0%        | 32.2%        | 28.0%        |
| Aspartic acid       | 0.797                                                                                             | 0.969        | 0.968        | 0.970        | 0.833        | 0.929        | 30.0%                                       | 6.9%         | 6.8%         | 6.8%         | 27.1%        | 28.0%        |
| C14:0 carnitine     | -0.179                                                                                            | 0.577        | 0.642        | 0.652        | -0.260       | -0.009       | 109.1%                                      | 25.0%        | 15.2%        | 17.3%        | 124.2%       | 79.0%        |
| C16:0 carnitine     | 0.596                                                                                             | 0.297        | 0.348        | 0.324        | 0.462        | 0.546        | 68.4%                                       | 29.5%        | 28.0%        | 26.9%        | 78.6%        | 47.6%        |
| C2 carnitine        | 0.683                                                                                             | 0.763        | 0.804        | 0.763        | 0.520        | 0.680        | 44.9%                                       | 22.0%        | 18.4%        | 19.5%        | 50.1%        | 28.7%        |
| C3 carnitine        | 0.516                                                                                             | 0.580        | 0.605        | 0.558        | 0.554        | 0.182        | 84.9%                                       | 26.2%        | 22.3%        | 20.8%        | 69.0%        | 80.7%        |
| C4 carnitine        | 0.656                                                                                             | 0.810        | 0.852        | 0.859        | 0.550        | 0.821        | 54.2%                                       | 22.1%        | 19.1%        | 18.6%        | 60.5%        | 24.4%        |
| C5 carnitine        | 0.555                                                                                             | 0.887        | 0.953        | 0.923        | 0.530        | 0.831        | 48.8%                                       | 15.5%        | 10.2%        | 13.2%        | 56.5%        | 20.0%        |
| C8 carnitine        | 0.592                                                                                             | 0.872        | 0.967        | 0.953        | 0.487        | 0.816        | 72.8%                                       | 17.8%        | 10.6%        | 13.5%        | 83.8%        | 36.8%        |
| Citrate             | 0.308                                                                                             | 0.852        | 0.870        | 0.842        | 0.275        | 0.598        | 71.5%                                       | 17.5%        | 15.7%        | 18.5%        | 62.5%        | 34.2%        |
| Glutamic acid       | 0.886                                                                                             | 0.983        | 0.986        | 0.985        | 0.899        | 0.866        | 30.4%                                       | 8.1%         | 7.9%         | 7.9%         | 27.1%        | 30.3%        |
| Glycine             | 0.158                                                                                             | 0.597        | 0.589        | 0.610        | 0.353        | 0.520        | 36.2%                                       | 11.5%        | 12.4%        | 11.5%        | 40.7%        | 42.4%        |
| Histidine           | 0.367                                                                                             | 0.470        | 0.462        | 0.451        | 0.423        | 0.309        | 48.8%                                       | 15.7%        | 16.0%        | 15.7%        | 52.6%        | 58.7%        |
| Lactate             | 0.730                                                                                             | 0.919        | 0.923        | 0.921        | 0.794        | 0.759        | 34.5%                                       | 15.4%        | 15.5%        | 15.3%        | 30.7%        | 28.4%        |
| L-Carnitine         | 0.425                                                                                             | 0.421        | 0.474        | 0.427        | 0.265        | 0.380        | 50.1%                                       | 24.0%        | 19.2%        | 19.9%        | 61.9%        | 28.7%        |
| Leucine+Isoleucine  | 0.601                                                                                             | 0.923        | 0.934        | 0.925        | 0.531        | 0.436        | 29.1%                                       | 8.5%         | 8.0%         | 8.5%         | 28.1%        | 36.4%        |
| Malate              | 0.486                                                                                             | 0.910        | 0.918        | 0.906        | 0.714        | 0.567        | 41.2%                                       | 8.9%         | 8.6%         | 8.9%         | 32.3%        | 34.9%        |
| Oleic acid          | 0.785                                                                                             | 0.948        | 0.950        | 0.951        | 0.864        | 0.611        | 34.8%                                       | 18.5%        | 18.3%        | 18.5%        | 44.6%        | 46.2%        |
| Palmitic acid       | 0.763                                                                                             | 0.930        | 0.932        | 0.934        | 0.803        | 0.562        | 35.2%                                       | 19.0%        | 18.9%        | 19.1%        | 44.9%        | 46.3%        |
| Phenylalanine       | 0.517                                                                                             | 0.896        | 0.913        | 0.905        | 0.510        | 0.547        | 26.7%                                       | 9.2%         | 8.4%         | 9.0%         | 26.5%        | 34.2%        |
| Proline             | 0.652                                                                                             | 0.852        | 0.854        | 0.854        | 0.616        | 0.567        | 26.0%                                       | 10.1%        | 10.7%        | 9.9%         | 27.6%        | 34.6%        |
| Serine              | 0.377                                                                                             | 0.639        | 0.646        | 0.630        | 0.246        | 0.219        | 44.9%                                       | 22.7%        | 22.6%        | 22.8%        | 51.4%        | 66.5%        |
| Succinate           | 0.638                                                                                             | 0.935        | 0.935        | 0.931        | 0.702        | 0.284        | 30.9%                                       | 7.7%         | 7.4%         | 7.3%         | 29.0%        | 31.3%        |
| Threonine           | 0.480                                                                                             | 0.838        | 0.842        | 0.841        | 0.441        | 0.507        | 38.5%                                       | 9.9%         | 10.0%        | 10.1%        | 37.4%        | 37.7%        |
| Tyrosine            | 0.675                                                                                             | 0.898        | 0.913        | 0.903        | 0.568        | 0.583        | 24.5%                                       | 10.4%        | 9.8%         | 10.1%        | 32.3%        | 38.3%        |
| Valine              | 0.465                                                                                             | 0.828        | 0.848        | 0.820        | 0.415        | 0.335        | 32.2%                                       | 12.1%        | 11.4%        | 12.2%        | 28.0%        | 34.9%        |
| <b>AVERAGE</b>      | <b>0.540</b>                                                                                      | <b>0.785</b> | <b>0.805</b> | <b>0.794</b> | <b>0.531</b> | <b>0.548</b> | <b>45.7%</b>                                | <b>15.6%</b> | <b>14.1%</b> | <b>14.4%</b> | <b>47.4%</b> | <b>39.8%</b> |

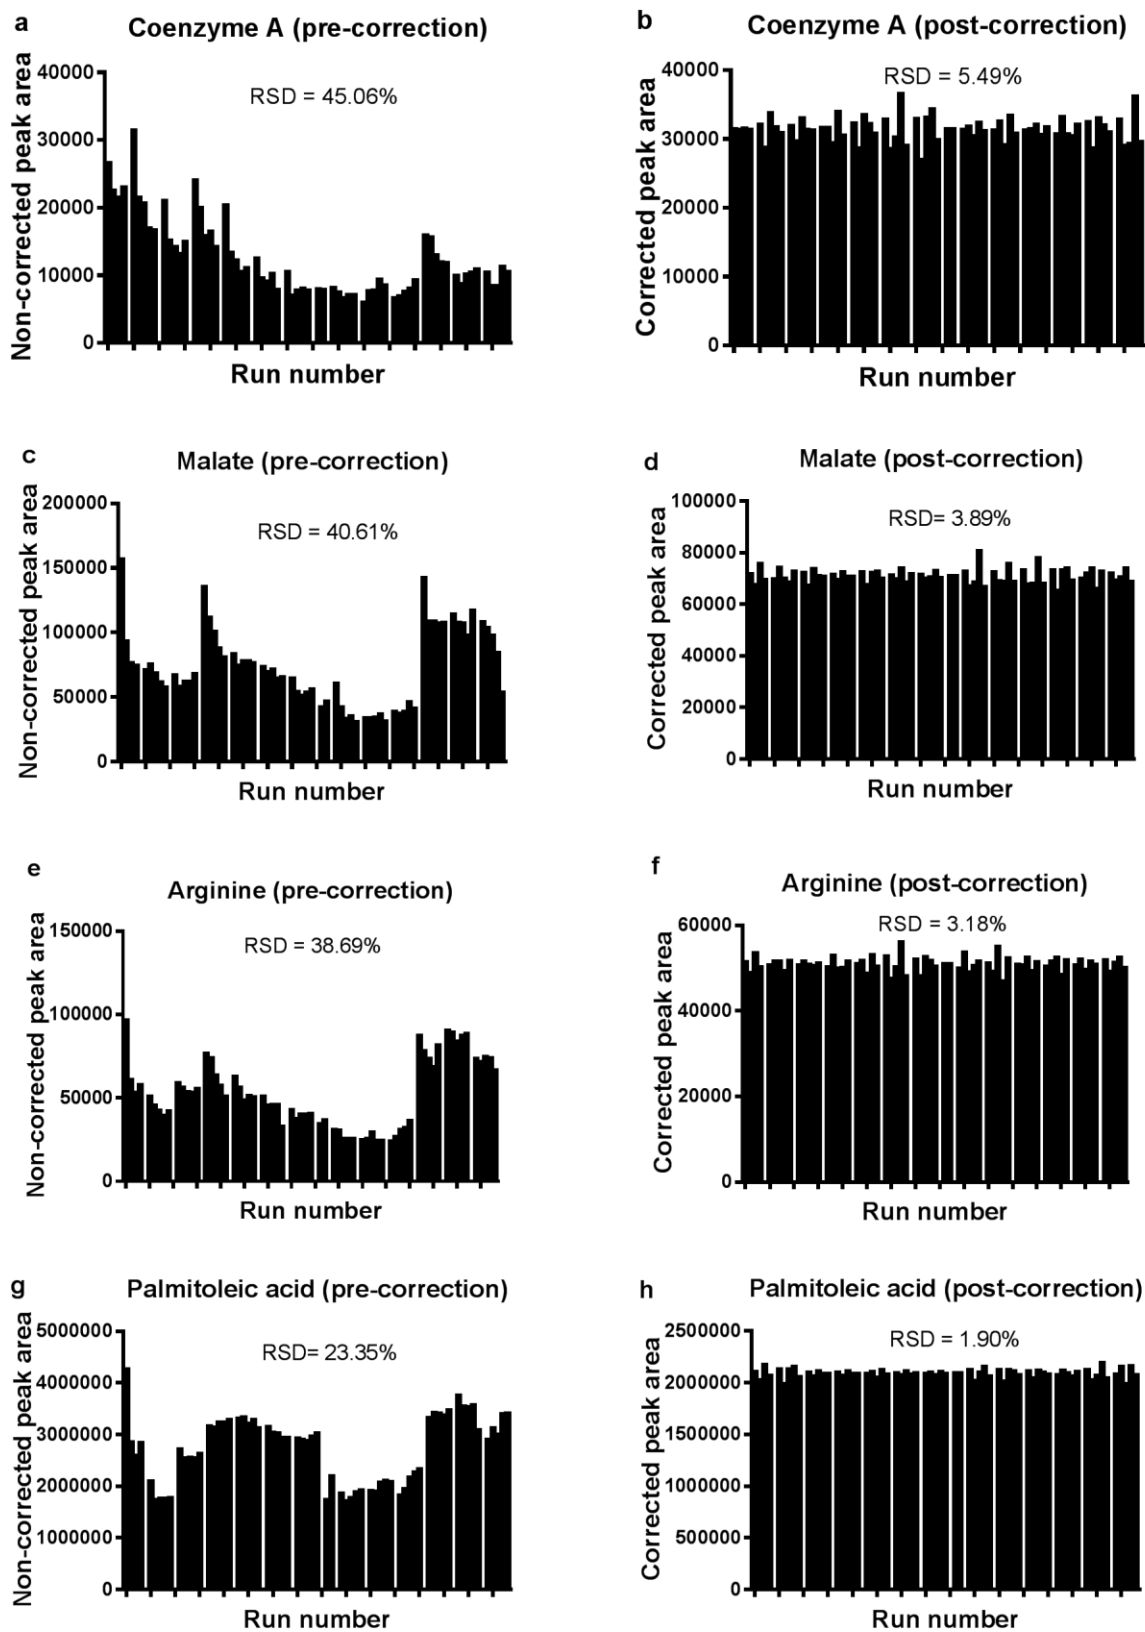

**Figure S1. Effect of QC drift correction on metabolites from MMTT dataset.** QC-sample peak areas for select metabolites before (a,c,e,g) and after (b,d,f,h) quadratic drift correction, performed as described in section 2.4.

## Metabolomics Drift-Correction Method Selector Flow Chart

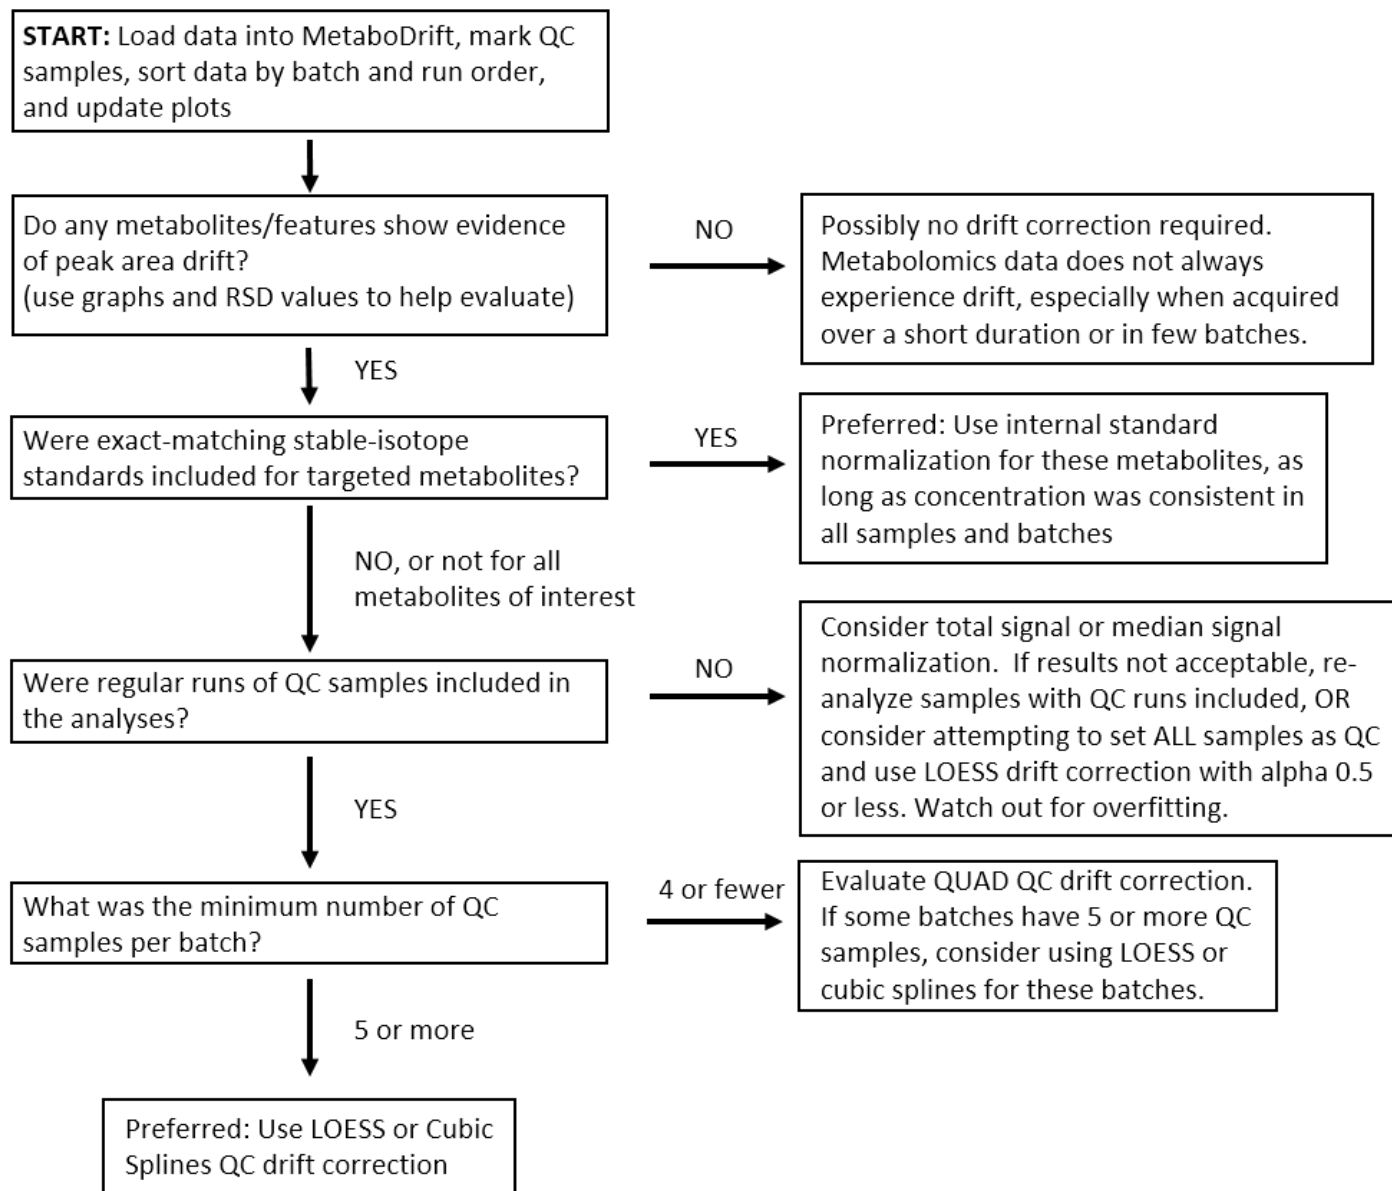

**Figure S2.** Flowchart to aid in selection of normalization or drift-correction strategy for metabolomics data.
